# Supplementary material for: Physiological random processes in precision cancer therapy
Source: PLOS journal article supplement (doi:10.1371/journal.pone.0199823), 2018-06-29
Supplement: S1 (10.1371/journal.pone.0199823.s001) [file journal.pone.0199823.s001]

## S1 Appendix: Mathematical Properties of Random Processes

We have considered several spatiotemporal physiological quantities in this work, such as the drug concentration  $c(\mathbf{r}, t)$ , susceptibility  $\alpha(\mathbf{r})$ , and diffusion coefficient  $D(\mathbf{r})$ . The point of view of this work is that such physiological processes can be modeled as random spatiotemporal functions  $\mathbf{f} = f(\mathbf{r}, t)$ . This assumption facilitated the rigorous computation of clinically relevant quantities such as probability of tumor control.

The goal of this supplement is to provide a brief discussion of some of the mathematical properties of random processes that were used in this work. General references for spatial random processes include [1, 2]; for an introduction in the context of image science, see [3, 4].

The statistical properties of a random quantity  $\mathbf{X}$  can be quantified by defining a probability function for  $\mathbf{X}$ , which assigns a number  $0 \leq \Pr(\mathbf{X} \in E) \leq 1$  that  $\mathbf{X}$  assumes values in the event set  $E$ . This can either be interpreted as a limiting frequency of occurrence in repeated trials, or as a prediction of chance conditional on available information [5]. Both interpretations are useful in the context of precision medicine.

We have assumed in this work that all finite-dimensional random quantities possess a *Probability Density Function* or *PDF*, which is a (possibly generalized) function  $\text{pr}(\mathbf{x})$  defined so that the average of any function of  $\mathbf{X}$  is given by

$$\langle g(\mathbf{X}) \rangle = \int_{\infty} d^n x g(\mathbf{x}) \text{pr}(\mathbf{x}), \quad (1)$$

where  $n$  is the dimension of  $\mathbf{X}$ . As a special case, the probability  $\Pr(\mathbf{X} \in E)$  is given by (1) with  $g(\mathbf{x}) = 1$  if  $\mathbf{x} \in E$  and zero otherwise. In this sense, the PDF  $\text{pr}(\mathbf{x})$  contains all statistical information about  $\mathbf{X}$ , because any desired average value or probability can be obtained from it. If  $\mathbf{X}$  is a random process, however, the issue of defining a PDF is much more subtle. Assuming that realizations are square integrable functions, i.e.  $\mathbf{f} \in L^2$ , we would ostensibly require a PDF in infinitely many variables as the dimension of  $L^2$  is infinite. While it is still sometimes possible to define PDFs for random processes, doing so requires fixing a so-called *reference measure*, and the choice of reference measure is usually not clear in infinite dimensions [6]. We avoid this technicality by working with the characteristic functional.

As stated in the main text, the spatial statistics of a random process  $f(\mathbf{r}, t)$  are fully described by the characteristic functional, defined as

$$\Psi_{\mathbf{f}}[\phi, t] = \left\langle \exp[-2\pi i(\phi, \mathbf{f})] \right\rangle \quad (2)$$

where the angle brackets indicate a statistical average (expectation) over all realizations of the process  $\mathbf{f}$ , and we define the scalar product of  $\phi$  and  $\mathbf{f}$  as

$$(\phi, \mathbf{f}) = \int_V d^3 r \phi(\mathbf{r}) f(\mathbf{r}, t). \quad (3)$$

We assume that the test function  $\phi$  is chosen so that (3) is well-defined; a more extensive discussion of this issue requires the theory of generalized functions which we avoid treating here [2, 4].

In Supporting Information S2, we provide several example functionals of the form (2). Note that (2) describes only the spatial statistics of  $\mathbf{f}$ ; if joint statistics across multiple time points are required, we must re-define (2) and (3) so that the test function  $\phi$  depends on time. Supposing that  $f(\mathbf{r}, t)$  is defined for  $\mathbf{r} \in V$  and  $t \geq 0$ , we would have

$$\Psi_{\mathbf{f}}[\phi] = \left\langle \exp[-2\pi i(\phi, \mathbf{f})] \right\rangle, \quad (\phi, \mathbf{f}) = \int_0^\infty dt \int_V d^3r \phi(\mathbf{r}, t) f(\mathbf{r}, t).$$

The strategy outlined in this paper was to manipulate various random processes to derive a scalar random quantity  $Y$ . We then demonstrated how the statistics of  $Y$  (that is, the PDF of  $Y$ ) could be derived from the relevant characteristic functionals. We will now describe how (2) can be used in general to derive useful statistical information about  $\mathbf{f}$ .

## Extracting finite-dimensional statistical quantities

Given a random process  $\mathbf{f}$ , the statistics of any finite-dimensional quantities of interest can be obtained from (2). Immediately from the definition, we can obtain the characteristic *function* of any scalar product of the form  $X = (\phi, \mathbf{f})$ , where  $\phi$  is a spatial test function, by noting that

$$\psi_X(\xi, t) = \left\langle \exp[-2\pi i \xi X] \right\rangle_X = \left\langle \exp[-2\pi i \xi(\phi, \mathbf{f})] \right\rangle_{\mathbf{f}} = \Psi_{\mathbf{f}}[\xi \phi, t]. \quad (4)$$

The PDF of  $X$  can then be obtained by inverse Fourier transform of  $\psi_X(\xi)$ . Similarly, given any finite dimensional vector of scalar products, say  $\mathbf{X} = [(\phi_1, \mathbf{f}), \dots, (\phi_n, \mathbf{f})]$ , we can obtain the characteristic function of  $\mathbf{X}$  by

$$\begin{aligned} \psi_{\mathbf{X}}(\boldsymbol{\xi}, t) &= \left\langle \exp[-2\pi i \boldsymbol{\xi}^T \mathbf{X}] \right\rangle = \left\langle \exp \left[ -2\pi i \sum_{j=1}^n \xi_j (\phi_j, \mathbf{f}) \right] \right\rangle \\ &= \left\langle \exp \left[ -2\pi i \left( \sum_{j=1}^n \xi_j \phi_j, \mathbf{f} \right) \right] \right\rangle \\ &= \Psi_{\mathbf{f}} \left[ \sum_{j=1}^n \xi_j \phi_j, t \right]. \end{aligned} \quad (5)$$

The PDF of  $\mathbf{X}$  can then be obtained by inverse Fourier transform of  $\psi_{\mathbf{X}}(\boldsymbol{\xi}, t)$ .

A special case of (5) occurs when we take  $\phi_j = \delta(\mathbf{r} - \mathbf{r}_j)$  for some collection of sample points  $\mathbf{r}_1, \dots, \mathbf{r}_n$ . Then, (so long as  $\Psi_{\mathbf{f}}$  is well-defined for such inputs),

the characteristic function of  $\mathbf{X} = [f(\mathbf{r}_1, t), \dots, f(\mathbf{r}_n, t)]$  would be given by

$$\psi_{\mathbf{X}}(\boldsymbol{\xi}, t) = \Psi_{\mathbf{f}} \left[ \sum_{j=1}^n \xi_j \delta(\mathbf{r} - \mathbf{r}_j), t \right]$$

The statistics of nonlinear functionals of the process  $\mathbf{f}$  can be obtained from  $\Psi_{\mathbf{f}}$  by similar but more involved procedures. For instance, suppose a scalar  $Y$  is obtained by nonlinear transformation of a single scalar product, i.e.  $Y = F[(\boldsymbol{\phi}, \mathbf{f})]$ . The PDF of  $Y$  can be obtained by first using (4) to obtain the PDF of  $(\boldsymbol{\phi}, \mathbf{f})$ , then the PDF of  $Y$  is obtained via the standard PDF transformation law [4]. This can then be extended to the case where  $Y$  is a function of several scalar products using (5), and then the general case where  $Y = F[\mathbf{f}]$  is a general nonlinear functional can be treated by expanding  $\mathbf{f}$  in an orthonormal basis  $\{\mathbf{e}_j\}$  and writing  $Y = \tilde{F}[(\mathbf{f}, \mathbf{e}_1), (\mathbf{f}, \mathbf{e}_2), \dots]$ .

## Joint and conditional characteristic functionals

Another strategy commonly employed in this paper was the usage of multiple interacting processes and *conditional* characteristic functionals. Given two random processes  $\mathbf{f}$  and  $\mathbf{g}$ , we can consider their joint characteristic functional:

$$\begin{aligned} \Psi_{\mathbf{f}, \mathbf{g}}[\boldsymbol{\phi}_1, \boldsymbol{\phi}_2, t] &= \left\langle \exp \left[ -2\pi i ((\boldsymbol{\phi}_1, \mathbf{f}) + (\boldsymbol{\phi}_2, \mathbf{g})) \right] \right\rangle \\ &= \left\langle \exp [-2\pi i (\boldsymbol{\phi}_1, \mathbf{f})] \exp [-2\pi i (\boldsymbol{\phi}_2, \mathbf{g})] \right\rangle. \end{aligned} \quad (6)$$

We say that  $\mathbf{f}$  and  $\mathbf{g}$  are *independent* if and only if (6) factors as the product  $(6) = \Psi_{\mathbf{f}}[\boldsymbol{\phi}_1, t] \Psi_{\mathbf{g}}[\boldsymbol{\phi}_2, t]$ . Fixing a realization of one or the other of  $\mathbf{f}$  or  $\mathbf{g}$  results in a *conditional* characteristic functional. For instance, fixing  $\mathbf{g}$ , the conditional characteristic functional of  $\mathbf{f}|\mathbf{g}$  is defined as

$$\Psi_{\mathbf{f}|\mathbf{g}}[\boldsymbol{\phi}, t] = \left\langle \exp [-2\pi i (\boldsymbol{\phi}, \mathbf{f})] \right\rangle_{\mathbf{f}|\mathbf{g}}. \quad (7)$$

Note that (7) can be computed by first finding the joint PDF of the pair of random variables  $X = (\boldsymbol{\phi}_1, \mathbf{f})$  and  $Y = (\boldsymbol{\phi}_2, \mathbf{g})$ , e.g. via the joint characteristic functional (6). Then, the conditional PDF for  $X|Y$  can be derived, and (7) subsequently computed.

Given a conditional characteristic functional, we have the *chain rule* or *law of total expectation*, which states that

$$\Psi_{\mathbf{f}}[\boldsymbol{\phi}, t] = \left\langle \Psi_{\mathbf{f}|\mathbf{g}}[\boldsymbol{\phi}, t] \right\rangle_{\mathbf{g}} \quad (8)$$

Expressions similar to (4) and (5) can then be derived for functionals of multiple interacting random processes or conditional random processes by employing (6), (7) and (8); for example, if  $Y = (\mathbf{f}, \mathbf{g})$  is the scalar product of two random processes, then the PDF of  $Y$  can be obtained by a combination of (8) and (3).

## Moment functions

Another convenient description of the statistics of a random process comes via its moment functions. Given a process  $\mathbf{f}$ , the PDF of  $f(\mathbf{r}, t)$  is denoted  $p_{\mathbf{r},t}(x)$  (note that this is the PDF of the one-point sample values of  $f(\mathbf{r}, t)$ , not of the entire process). We then define the *mean function* of  $\mathbf{f}$  as

$$\bar{\mathbf{f}} \equiv \bar{f}(\mathbf{r}, t) = \langle f(\mathbf{r}, t) \rangle = \int_{\mathbb{R}} dx \, x p_{\mathbf{r},t}(x)$$

Note that  $\bar{f}(\mathbf{r}, t)$  is a deterministic function: randomness has been ‘averaged out’.

Now consider two samples,  $f(\mathbf{r}_1, t)$  and  $f(\mathbf{r}_2, t)$ . If we compute their covariance, we arrive at the *covariance function*:

$$k_{\mathbf{f}}(\mathbf{r}_1, \mathbf{r}_2, t) = \text{Cov}(f(\mathbf{r}_1, t), f(\mathbf{r}_2, t)) = \langle (f(\mathbf{r}_1, t) - \bar{f}(\mathbf{r}_1, t)) (f(\mathbf{r}_2, t) - \bar{f}(\mathbf{r}_2, t)) \rangle$$

The function  $k_{\mathbf{f}}$  describes the second order correlation structure of any random process. For instance if  $k_{\mathbf{f}}(\mathbf{r}_1, \mathbf{r}_2, t) = 0$ , the values of the process at  $\mathbf{r}_1, \mathbf{r}_2$  are uncorrelated; if  $\bar{\mathbf{f}}$  is constant and  $k_{\mathbf{f}}(\mathbf{r}_1, \mathbf{r}_2, t) \equiv k_{\mathbf{f}}(\mathbf{r}_1 - \mathbf{r}_2, t)$ , then the second order statistics of  $\mathbf{f}$  are shift-invariant and  $\mathbf{f}$  is called *wide-sense stationary* [1, 4]. We note that while the study of  $\bar{\mathbf{f}}$  and  $k_{\mathbf{f}}$  offers some useful insight into the structure of random processes, higher-order (i.e. three-point, four-point and so forth) correlation structures can be nontrivial, so in general we cannot assume that a process is completely described by its mean and covariance function; only the characteristic functional provides a complete description of  $\mathbf{f}$  in general.

The moment functions of a random process can be recovered from the characteristic functional by taking certain functional derivatives; see [3, 7].

## Transformation under a linear operator

One of the key features of the characteristic functional is that it behaves very favorably under linear transformation of realizations. Briefly, suppose that  $\mathcal{A}$  is a bounded linear operator with adjoint  $\mathcal{A}^\dagger$  (recall that  $\mathcal{A}^\dagger$  is the unique operator such that  $(\phi, \mathcal{A}\mathbf{f}) = (\mathcal{A}^\dagger\phi, \mathbf{f})$  for all pairs  $\{\phi, \mathbf{f}\}$ ). Then, if we consider the process  $g(\mathbf{r}, t) = (\mathcal{A}\mathbf{f})(\mathbf{r}, t)$ , it is easy to see from the definition of  $\Psi_{\mathbf{f}}$  that

$$\Psi_g[\phi, t] = \langle \exp [-2\pi i(\phi, \mathcal{A}\mathbf{f})] \rangle = \langle \exp [-2\pi i(\mathcal{A}^\dagger\phi, \mathbf{f})] \rangle = \Psi_{\mathbf{f}}[\mathcal{A}^\dagger\phi, t] \quad (9)$$

## References

- [1] Christakos G. Random field models in earth sciences. Courier Corporation; 2012.
- [2] Gel’fand IM, Vilenkin NY. Generalized functions, Vol. 4: applications of harmonic analysis. Academic Press; 1964.

- [3] Clarkson E, Barrett HH. Characteristic functionals in imaging and image-quality assessment: tutorial. *JOSA A*. 2016;33(8):1464–1475.
- [4] Barrett H, Myers K. Foundations of image science. John Wiley & Sons; 2004.
- [5] Jaynes ET. Probability theory: the logic of science. Cambridge University Press; 2003.
- [6] Sullivan TJ. Introduction to uncertainty quantification. Springer; 2015.
- [7] Monin AS, Yaglom AM. Statistical fluid mechanics: mechanics of turbulence. vol. 1. Lumley JL, editor. The MIT Press; 1971.
