# Supplementary material for: Physiological random processes in precision cancer therapy
Source: PLOS journal article supplement (doi:10.1371/journal.pone.0199823), 2018-06-29
Supplement: S2 (10.1371/journal.pone.0199823.s002) [file journal.pone.0199823.s002]

## S2 Appendix: Example Random Process Models

In this supplement, we offer a small collection of random processes models that are useful in modeling physiological and imaging systems, providing a functional form for the characteristic functional whenever possible. We display some numerical realizations, though we do not discuss simulation methods in depth; see e.g. the extensive recent book [1]. Refer also to the introductory paper [2].

Recall that the spatial characteristic functional is defined as

$$\Psi_{\mathbf{f}}[\phi, t] = \left\langle \exp [-2\pi i(\phi, \mathbf{f})] \right\rangle_{\mathbf{f}}. \quad (1)$$

By explicit functional form, we mean an expression which does not involve the expectation angle brackets in (1). As mentioned in S1, one can modify (1) to admit spatiotemporal test functions  $\phi \equiv \phi(\mathbf{r}, t)$  by simply modifying the definition of the scalar product  $(\phi, \mathbf{f})$  to incorporate time.

### Gaussian Processes

The class of Gaussian processes is the most commonly known. Its complete statistical characterization relies on only the mean function  $\bar{\mathbf{f}} = \bar{f}(\mathbf{r}, t)$  and the covariance function  $\mathbf{k} = k(\mathbf{r}_1, \mathbf{r}_2, t)$  (see S1). First, note that the covariance function defines a *covariance operator*  $\mathcal{K}_t$ , which acts on a test function  $\phi$  via

$$(\mathcal{K}_t \phi)(\mathbf{r}_1) = \int_V d^3 r_2 k(\mathbf{r}_1, \mathbf{r}_2, t) \phi(\mathbf{r}_2)$$

Given  $\bar{\mathbf{f}}$  and a valid  $\mathbf{k}$ ,  $\mathbf{f} \sim \mathcal{GP}(\bar{\mathbf{f}}, \mathbf{k})$  has characteristic functional [2, 3]

$$\Psi_{\mathbf{f}}[\phi(\mathbf{r}), t] = \exp [-2\pi i(\phi, \bar{\mathbf{f}})] \exp [-2\pi^2(\mathcal{K}_t \phi, \phi)] \quad (2)$$

where

$$(\phi, \bar{\mathbf{f}}) = \int_V d^3 r \phi(\mathbf{r}) \bar{f}(\mathbf{r}, t), \quad (\mathcal{K}_t \phi, \phi) = \int_V d^3 r_1 \int_V d^3 r_2 k(\mathbf{r}_1, \mathbf{r}_2, t) \phi(\mathbf{r}_2) \phi(\mathbf{r}_1)$$

One of the key features of a Gaussian process is that any finite dimensional sample is multivariate Gaussian. Indeed, let  $\mathbf{f} \sim \mathcal{GP}(\bar{\mathbf{f}}, \mathbf{k})$ ,  $n \geq 1$ ,  $\mathbf{r}_1, \dots, \mathbf{r}_n \in V$ , and  $t \geq 0$ . Then the random vector  $\mathbf{X} = [f(\mathbf{r}_1, t), \dots, f(\mathbf{r}_n, t)]$  has characteristic function

$$\begin{aligned} \psi_{\mathbf{X}}(\boldsymbol{\xi}) &= \Psi_{\mathbf{f}} \left[ \sum_{j=1}^n \xi_j \delta(\mathbf{r} - \mathbf{r}_j), t \right] \\ &= \exp \left[ -2\pi i \sum_{j=1}^n \xi_j (\delta(\mathbf{r} - \mathbf{r}_j), \bar{\mathbf{f}}) \right] \\ &\quad \times \exp \left[ -2\pi^2 \sum_{j,k=1}^n \xi_j \xi_k (\mathcal{K}_t \delta(\mathbf{r} - \mathbf{r}_j), \delta(\mathbf{r} - \mathbf{r}_k)) \right] \\ &= \exp [-2\pi i \boldsymbol{\xi}^\top \bar{\mathbf{X}}] \exp [-2\pi^2 \boldsymbol{\xi}^\top \mathbf{C} \boldsymbol{\xi}] \end{aligned} \quad (3)$$

where  $\top$  indicates the transpose and

$$\overline{\mathbf{X}}(i) = \bar{f}(\mathbf{r}_i, t), \quad C(i, j) = k(\mathbf{r}_i, \mathbf{r}_j, t). \quad (4)$$

Applying the inverse Fourier transform to (3), we obtain the PDF of  $\mathbf{X}_{\mathbf{r}_1:\mathbf{r}_n,t}$ :

$$p_{\mathbf{X}}(\mathbf{x}) = \frac{(2\pi)^{-n/2}}{\sqrt{\det(\mathbf{C})}} \exp\left(-\frac{1}{2}(\mathbf{x} - \overline{\mathbf{X}})^\top \mathbf{C}^{-1}(\mathbf{x} - \overline{\mathbf{X}})\right) \quad (5)$$

The finite dimensional distributions (5) provide a simple method to draw samples from  $\mathcal{GP}(\bar{\mathbf{f}}, \mathbf{k})$ : simply choose  $t$  and sample locations  $\mathbf{r}_1, \dots, \mathbf{r}_n \in V$ , form  $\overline{\mathbf{X}}$  and  $\mathbf{C}$  using (4), then use an existing multivariate Gaussian sampler (based on e.g. Cholesky factorization) to draw from  $\mathcal{N}(\overline{\mathbf{X}}, \mathbf{C})$ . However, this can be very inefficient if  $n$  is large, for instance sampling a fine grid of points in 3D: Cholesky factorization is  $O(n^3)$  and matrix multiplication is  $O(n^2)$ , so to draw  $K$  samples on a grid with  $m$  points per dimension, this method would be  $O(m^9)$  for the first sample, then  $O(Km^6)$  thereafter. Faster specialized methods are available if for instance  $\mathbf{k}$  is shift-invariant; see e.g. [1].

In addition to the sample-based finite dimensional distributions (5), it is also useful to have the density of scalar random variables of the sort  $X_{\phi,t} = (\phi, \mathbf{f}) = \int_V d^3r \phi(\mathbf{r})f(\mathbf{r}, t)$ , i.e. a scalar product with a fixed test function. Such a random variable has (univariate) PDF  $p_{\phi,t}$  given by

$$p_{\phi,t}(x) = \frac{1}{\sqrt{2\pi\sigma_{\phi,t}^2}} \exp\left(-\frac{(x - m_{\phi,t})^2}{2\sigma_{\phi,t}^2}\right) \quad (6)$$

where  $\sigma_{\phi,t} = (\mathcal{K}_t \phi, \phi)$  and  $m_{\phi,t} = (\phi, \bar{\mathbf{f}})$ , with  $\mathcal{K}$  and  $\bar{\mathbf{f}}$  respectively the covariance operator and mean function of the process  $\mathbf{f}$ . Note that as the mean and covariance functions may depend on time, the PDF (6) also evolves in time.

One application of (2) is to provide a rigorous description of the *Gaussian white noise* process  $\mathbf{w}$ . While somewhat challenging to describe using standard probabilistic definitions, the characteristic functional provides a direct method to define a process which has mean zero and ‘independent standard normal values at every point’. Intuitively, one would like the covariance function to be zero for  $\mathbf{r}_1 \neq \mathbf{r}_2$ , but nonzero for  $\mathbf{r}_1 = \mathbf{r}_2$ ; the logical choice is a Dirac delta covariance, that is,  $k(\mathbf{r}_1, \mathbf{r}_2, t) = \delta(\mathbf{r}_1 - \mathbf{r}_2)$ . This leads to a covariance operator  $\mathcal{K}$  which is the identity operator, and hence the characteristic functional [4]

$$\Psi_{\mathbf{w}}[\phi] = \exp(-2\pi^2(\phi, \phi)) = \exp\left(-2\pi^2 \int_V d^3r |\phi(\mathbf{r})|^2\right)$$

A fairly wide variety of processes can be obtained under the Gaussian model by choosing different mean and covariance functions. The only requirement on  $\bar{\mathbf{f}}$  and  $\mathbf{k}$  is that  $\mathbf{k}$  be *non-negative-type*, which means that any matrix of the form  $C(i, j) = k(\mathbf{r}_i, \mathbf{r}_j, t)$  must be symmetric and non-negative definite i.e. a valid covariance matrix. Several common examples of covariance functions are provided in Table 1. In Figure 1 we display realizations for several choices of  $\mathbf{k}$ .

| #   | Name           | Covariance function $\mathbf{k}$                                                                                                                                                                                        |
|-----|----------------|-------------------------------------------------------------------------------------------------------------------------------------------------------------------------------------------------------------------------|
| (1) | Gaussian       | $k(\mathbf{r}_1, \mathbf{r}_2; \sigma, \mathbf{A}) = \sigma^2 \exp\left(-\frac{1}{2}(\mathbf{r}_1 - \mathbf{r}_2)^t \mathbf{A}(\mathbf{r}_1 - \mathbf{r}_2)\right)$                                                     |
| (2) | Exponential    | $k(\mathbf{r}_1, \mathbf{r}_2; \sigma, \ell) = \sigma^2 \exp(-\ \mathbf{r}_1 - \mathbf{r}_2\ /\ell)$                                                                                                                    |
| (3) | Matérn-Whittle | $k(\mathbf{r}_1, \mathbf{r}_2; \sigma, \nu, \ell) = \frac{\sigma^2}{2^{\nu-1}\Gamma(\nu)} \left(\frac{\ \mathbf{r}_1 - \mathbf{r}_2\ }{\ell}\right)^\nu K_\nu\left(\frac{\ \mathbf{r}_1 - \mathbf{r}_2\ }{\ell}\right)$ |
| (4) | Bessel         | $k(\mathbf{r}_1, \mathbf{r}_2; \sigma, \nu) = \sigma^2 \Gamma(d/2) \frac{J_\nu(\ \mathbf{r}_1 - \mathbf{r}_2\ )}{(\ \mathbf{r}_1 - \mathbf{r}_2\ /2)^\nu}$                                                              |
| (5) | White noise    | $k(\mathbf{r}_1, \mathbf{r}_2) = \delta(\mathbf{r}_1 - \mathbf{r}_2)$                                                                                                                                                   |

Table 1: A short list of common covariance functions used in spatial random process modeling, found in refs. [1, 5, 4, 6, 7]. The special functions  $\Gamma(\cdot)$ ,  $K_\nu$ ,  $J_\nu$  are respectively the Gamma function, modified Bessel function of the second kind, and Bessel function of the first kind. The matrix  $A$  in (1) must be symmetric nonnegative definite. Covariances (2)-(4) are their isotropic versions; anisotropic variants can also be defined. The covariance (5) must be interpreted as the generalized kernel of an integral operator.

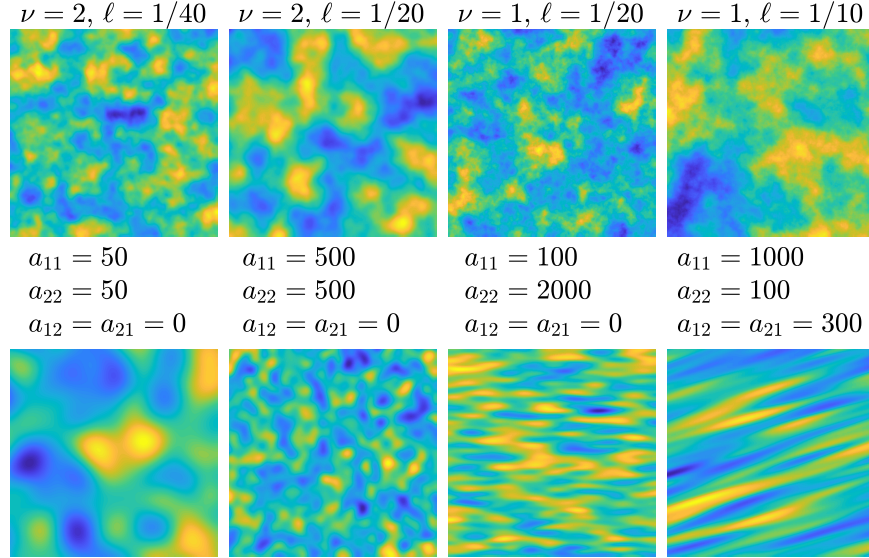

Figure 1: Simulated Gaussian random processes  $f(\mathbf{r}, t)$  on  $V = [0, 1]^2$ . Top row uses the isotropic Matérn-Whittle covariance function (function (3) in Table 1) with parameters indicated above, while the bottom row uses the Gaussian covariance (function (1) in Table 1) with  $A = (a_{ij})$  indicated above. All samples use variance  $\sigma^2 = 1$  and were computed using Algorithm 7.6 in [1].

## Lognormal Processes

One undesirable feature of the Gaussian model for physiology applications is that realizations are not guaranteed to be non-negative, whereas many physiological processes necessarily are. Given  $\mathbf{z} \sim \mathcal{GP}(\bar{\mathbf{f}}, \mathbf{k})$ , one possibility to easily generate other random processes from  $\mathbf{z}$  is to consider point transformations of  $\mathbf{z}$ , i.e. we generate a process  $\mathbf{f}$  by simply applying a deterministic function  $\Upsilon$  to the realizations of  $\mathbf{z}$ :

$$f(\mathbf{r}, t, \omega) = \Upsilon(z(\mathbf{r}, t, \omega))$$

For the particular choice of  $\Upsilon(z) = \exp(z)$ , we form the class of *lognormal* processes, denoted  $\mathcal{LN}(\bar{\mathbf{f}}, \mathbf{k})$ , via

$$f(\mathbf{r}, t, \omega) = \exp(z(\mathbf{r}, t, \omega)), \quad \mathbf{z} \sim \mathcal{GP}(\bar{\mathbf{f}}, \mathbf{k})$$

It is well-known that the characteristic function of a lognormal random variable does not admit a closed-form representation [8], so similarly we cannot expect that a lognormal random process will admit a closed-form representation for the characteristic functional. In this work (namely S3), we were able to successfully manipulate  $\mathbf{z} = \log \mathbf{f}$  using (2), so this was a non-issue.

## Poisson Point Processes

A very useful class of non-Gaussian random process models are the various *point processes*. Realizations of a point process take the form

$$f(s) = \sum_{j=1}^N \delta(s - S_j) \quad (7)$$

where  $S_1, \dots, S_n$  is some collection of random states or sample points and  $N$  is a possibly random number of samples. We will consider only spatiotemporal *Poisson* point processes where  $S_j = (\mathbf{R}_j, T_j)$  denotes a random spatiotemporal vector and the number of points  $N$  is a Poisson random variable. More general point processes are also possible [9, 3, 10].

To define a spatiotemporal Poisson Point Process (PPP), we require only an *intensity function*  $\lambda(\mathbf{r}, t)$ , which is a non-negative, integrable function on  $V \times [0, \infty)$ . We then define the mean number of points as

$$\bar{N} = \int_0^\infty \int_V \lambda(\mathbf{r}, t) d^3r dt < \infty$$

To form a point process of the sort (7), we first sample  $N \sim \text{Poi}(\bar{N})$ , where  $\text{Poi}(\bar{N})$  is the Poisson distribution with rate  $\bar{N}$ . Then, we consider random variables  $(\mathbf{R}_1, T_1), \dots, (\mathbf{R}_N, T_N)$ , independent and identically distributed with probability density

$$p(\mathbf{r}, t) = \frac{\lambda(\mathbf{r}, t)}{\bar{N}}$$

Given a realization  $N = n$  and samples  $(\mathbf{R}_1, T_1) = (\mathbf{r}_1, t_1), \dots, (\mathbf{R}_n, T_n) = (\mathbf{r}_n, t_n)$ , we form the point process as in (7):

$$f(\mathbf{r}, t) = \sum_{j=1}^n \delta(\mathbf{r} - \mathbf{r}_j) \delta(t - t_j) \quad (8)$$

Note that as (8) is a generalized function, one must take care in defining its statistical properties. For instance, the finite dimensional point sample vectors  $\mathbf{X} = [f(\mathbf{r}_1, t), \dots, f(\mathbf{r}_n, t)]$  become meaningless. However, the finite dimensional vectors  $\mathbf{X} = [(\phi_1, \mathbf{f}), \dots, (\phi_n, \mathbf{f})]$  and thus the characteristic functional is still well-defined, because of their definition in terms of test functions. To derive  $\Psi_{\mathbf{f}}[\phi]$  (which is now a spatiotemporal characteristic functional; see S1), we let  $\phi \equiv \phi(\mathbf{r}, t)$  be a (Schwartz class, say) test function. Then,

$$(\phi, \mathbf{f}) = \sum_{j=1}^N \phi(\mathbf{R}_j, T_j)$$

where  $N, \{\mathbf{R}_j\}$  and  $\{T_j\}$  are the random quantities discussed above. Thus

$$\exp[-2\pi i(\phi, \mathbf{f})] = \prod_{j=1}^N \exp[-2\pi i\phi(\mathbf{R}_j, T_j)]$$

We then perform the expected value in (1) using the law of total probability and the definition of the random vector  $(\mathbf{R}_j, T_j)$ :

$$\begin{aligned} \Psi_{\mathbf{f}}[\phi] &= \left\langle \left\langle \exp[-2\pi i(\phi, \mathbf{f})] \right\rangle_{\{(\mathbf{R}_j, T_j)\}_{|N}} \right\rangle_N \\ &= \left\langle \left( \int_0^\infty dt \int_V d^3r \exp(-2\pi i\phi(\mathbf{r}, t)) \frac{\lambda(\mathbf{r}, t)}{\bar{N}} \right)^N \right\rangle_N \\ &= \sum_{n=0}^\infty \frac{q_\phi^n \exp(-\bar{N}) \bar{N}^n}{\bar{N}^n n!} \\ &= \exp(-\bar{N}) \exp(q_\phi) \end{aligned}$$

where we have defined  $q_\phi \equiv \int_0^\infty dt \int_V d^3r \exp(-2\pi i\phi(\mathbf{r}, t)) \lambda(\mathbf{r}, t)$ . Recalling the definition of  $\bar{N}$ , we can simplify once more to obtain

$$\Psi_{\mathbf{f}}[\phi] = \exp \left[ \int_0^\infty dt \int_V d^3r (\exp(-2\pi i\phi(\mathbf{r}, t)) - 1) \lambda(\mathbf{r}, t) \right]$$

We briefly discuss some extensions of the PPP model (8). First, we can consider a *filtered* version of (8), whereby we compute  $g(\mathbf{r}, t) = (\mathcal{A}f)(\mathbf{r}, t)$  where  $\mathcal{A}$  is a linear operator (defined for generalized functions). For instance, suppose

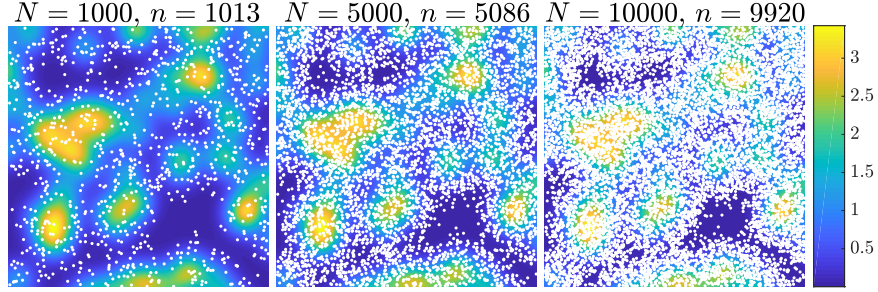

Figure 2: Simulation of three Poisson point processes with fixed PDF  $p(\mathbf{r}, t) = \lambda(\mathbf{r}, t)/\bar{N}$  and varying  $\bar{N}$ . In each panel, a single realization of  $f(\mathbf{r}, t)$  is displayed (white dots) over the color intensity plot of  $p(\mathbf{r}, t)$ . The mean number of points  $\bar{N}$  and the realized number of points  $n$  are displayed above each panel. The PDF  $p(\mathbf{r}, t)$  is a realization of a lumpy background process.

$h(\mathbf{r}, t)$  is a real, continuous, compactly supported function. Then, define  $\mathbf{g} = \mathcal{A}\mathbf{f}$  to be the convolution of  $\mathbf{f}$  with  $h(\mathbf{r}, t)$ :

$$\begin{aligned} g(\mathbf{r}, t) &= (h * f)(\mathbf{r}, t) \\ &= \int_0^\infty dt' \int_{\mathbb{R}^3} d^3r' h(\mathbf{r} - \mathbf{r}', t - t') \sum_{j=1}^N \delta(\mathbf{r}' - \mathbf{R}_j) \delta(t' - T_j) \\ &= \sum_{j=1}^N h(\mathbf{r} - \mathbf{R}_j, t - T_j) \end{aligned} \quad (9)$$

The characteristic functional of (9) then follows by the general relation for linearly transformed random processes (discussed in S1), namely that  $\Psi_{\mathbf{g}}[\phi] = \Psi_{\mathbf{f}}[\mathcal{A}^\dagger \phi]$ . With  $\mathcal{A} = h*$ , we have  $\mathcal{A}^\dagger = \tilde{h}*$  where  $\tilde{h}(\mathbf{r}, t) = h(-\mathbf{r}, -t)$ , and so

$$\Psi_{\mathbf{g}}[\phi] = \exp \left[ \int_0^\infty dt \int_V d^3r \left( \exp(-2\pi i(\tilde{h} * \phi)(\mathbf{r}, t)) - 1 \right) \lambda(\mathbf{r}, t) \right]$$

A particular example of (9) can be used to simulate extravascular drug diffusion component  $c^{diff}$  (see S4 and the main text). Let  $h(\mathbf{r}, t)$  be the fundamental solution (Green's function) of a constant-coefficient diffusion equation, that is,

$$h(\mathbf{r}, t) = \frac{1}{(4\pi D_0 t)^{d/2}} \exp \left( -\frac{\|\mathbf{r}\|^2}{4D_0 t} \right)$$

then a solution to the diffusion equation with Poisson point process source  $s(\mathbf{r}, t)$  results in a generalized Lumpy background process of the type (9):

$$c^{diff}(\mathbf{r}, t) = \sum_{j=1}^n h(\mathbf{r} - \mathbf{r}_j, t - t_j) = \sum_{j=1}^N \frac{1}{(4\pi D_0(t - t_j))^{d/2}} \exp \left( -\frac{\|\mathbf{r} - \mathbf{r}_j\|^2}{4D_0(t - t_j)} \right)$$

Taking (9) as a starting point, one can construct a wide array of possible random processes by choosing a different kernel functions  $\mathbf{h}$ , or even allowing multiple kernel functions  $h_j(\mathbf{r}, t)$  in the sum (9). In general, we call a random process of the type

$$f(\mathbf{r}, t) = \sum_{j=1}^N h_j(\mathbf{r}, t; \boldsymbol{\theta}_j) \quad (10)$$

a *generalized lumpy background process*. The random variables that generate (10) are  $N$  and  $(\boldsymbol{\theta}_1, \dots, \boldsymbol{\theta}_N)$ . The functions  $h_j(\mathbf{r}, t; \boldsymbol{\theta})$  need not be the same type of function nor do they need to form a basis for any function space. Functions similar to (10) have been called *kernel density estimators* and *mixture models* [11], *shot noise* [10, 12], *lumpy backgrounds* [13, 14] and *texton noise* [15]. The model (10) can be evaluated in parallel at very high speed, and  $\mathbf{h}_j$  can be chosen to match observed texture statistics [15, 16] or display desired regularity, nonnegativeness, boundedness, or any other desired sample function property. In particular, (10) can be made highly non-stationary and non-Gaussian, making it a particularly appealing class of models for physiological processes.

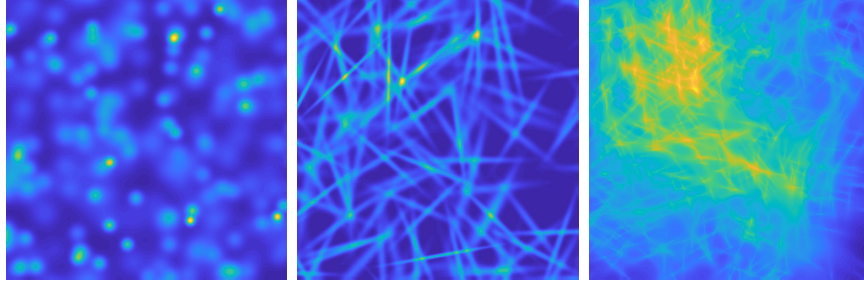

Figure 3: Three realizations of generalized lumpy background processes of the form (10) on the unit square  $V = [0, 1]^2$ . On the left, each lump takes the form  $h_j(\mathbf{r}) = A_j \exp(-\|\mathbf{r}\|^2/2\sigma_j^2)$  with  $\sigma_j^2$  drawn randomly from a lognormal distribution. In the middle, each lump takes the form  $h_j(\mathbf{r}) = A \exp(-\mathbf{r}^t B_j \mathbf{r}/2)$  where  $B_j$  is a  $2 \times 2$  positive definite matrix formed by rotating a matrix  $B_0$  randomly. On the right is a *clustered* lumpy background [14] where each lump is of the form  $h_j(\mathbf{r}) = \sum_{k=1}^{n_j} h(\mathbf{r} - \mathbf{r}_{jk})$ .

The second direction we can generalize either (7), (9) or (10) is to allow the PPP intensity function  $\boldsymbol{\lambda} \equiv \lambda(\mathbf{r}, t)$  to be a realization of a *secondary* random process, that is, we suppose that  $\boldsymbol{\lambda}$  is a random process whose realizations are (almost surely) nonnegative and integrable. Then, if for each realization of  $\boldsymbol{\lambda}$  we form a Poisson point process, we call the resulting random process a *doubly stochastic* or *Cox* Poisson point process [17, 9, 10], after which the filtered forms (9) or (10) can be formed.

## References

- [1] Lord GJ, Powell CE, Shardlow T. Introduction to Computational Stochastic PDEs. Cambridge; 2014.
- [2] Clarkson E, Barrett HH. Characteristic functionals in imaging and image-quality assessment: tutorial. *JOSA A*. 2016;33(8):1464–1475.
- [3] Barrett H, Myers K. Foundations of image science. John Wiley & Sons; 2004.
- [4] Gel’fand IM, Vilenkin NY. Generalized functions, Vol. 4: applications of harmonic analysis. Academic Press; 1964.
- [5] Christakos G. Random field models in earth sciences. Courier Corporation; 2012.
- [6] Stein ML. Interpolation of spatial data: some theory for kriging. Springer Science & Business Media; 2012.
- [7] Matérn B. Spatial variation. vol. 36. Springer Science & Business Media; 2013.
- [8] Lukacs E. Characteristic functions. 1970;.
- [9] Reiss RD. A course on point processes. Springer Science & Business Media; 2012.
- [10] Snyder DL, Miller MI. Random point processes in time and space. Springer Science & Business Media; 2012.
- [11] Silverman BW. Density estimation for statistics and data analysis. vol. 26. CRC press; 1986.
- [12] Davenport WB, Root WL, et al. An introduction to the theory of random signals and noise. vol. 159. McGraw-Hill New York; 1958.
- [13] Rolland JPY. Factors influencing lesion detection in medical imaging. The University of Arizona.; 1990.
- [14] Bochud F, Abbey C, Eckstein M. Statistical texture synthesis of mammographic images with clustered lumpy backgrounds. *Optics Express*. 1999;4(1):33–42.
- [15] Galerne B, Leclaire A, Moisan L. Texton noise. In: Computer Graphics Forum. Wiley Online Library; 2017.
- [16] Kupinski MA, Clarkson E, Hoppin JW, Chen L, Barrett HH. Experimental determination of object statistics from noisy images. *JOSA A*. 2003;20(3):421–429.
- [17] Cox DR. Some statistical methods connected with series of events. *Journal of the Royal Statistical Society Series B (Methodological)*. 1955; p. 129–164.
